# Supplementary material for: Prognostic Performance of Sequential Organ Failure Assessment, Acute Physiology and Chronic Health Evaluation III, and Simplified Acute Physiology Score II Scores in Patients with Suspected Infection According to Intensive Care Unit Type
Source: MDPI journal article supplement (doi:10.3390/jcm12196402), 2023-10-08

**Table S1.** Six components of SOFA according to ICU type.

| ICU type    | Cardiovascular SOFA    | CNS SOFA               | Respiratory SOFA       | Renal SOFA             | Hepatic SOFA            | Coagulation SOFA       |
|-------------|------------------------|------------------------|------------------------|------------------------|-------------------------|------------------------|
| MICU        | 1.5 ± 1.4              | 1.2 ± 1.3              | 1.1 ± 1.5              | 1.3 ± 1.4              | 0.6 ± 1.1               | 0.7 ± 1.0              |
| MICU/SICU   | 1.4 ± 1.3 <sup>a</sup> | 1.1 ± 1.2 <sup>a</sup> | 0.8 ± 1.3 <sup>a</sup> | 1.0 ± 1.3 <sup>a</sup> | 0.5 ± 1.0 <sup>a</sup>  | 0.7 ± 1.1              |
| CCU         | 1.6 ± 1.4 <sup>a</sup> | 1.1 ± 1.3 <sup>a</sup> | 1.0 ± 1.5              | 1.2 ± 1.3              | 0.2 ± 0.7 <sup>a</sup>  | 0.5 ± 0.7 <sup>a</sup> |
| CVICU       | 1.5 ± 1.0              | 1.1 ± 1.3 <sup>a</sup> | 1.7 ± 1.3 <sup>a</sup> | 0.4 ± 0.8 <sup>a</sup> | 0.1 ± 0.3 <sup>a</sup>  | 0.8 ± 0.7 <sup>a</sup> |
| NSICU       | 1.0 ± 1.1 <sup>a</sup> | 1.8 ± 1.3 <sup>a</sup> | 0.7 ± 1.2 <sup>a</sup> | 0.6 ± 1.0 <sup>a</sup> | 0.2 ± 0.6 <sup>a</sup>  | 0.5 ± 0.8 <sup>a</sup> |
| Neuro-ICU   | 0.4 ± 0.6 <sup>a</sup> | 1.3 ± 1.1              | 0.04 ± 0.3             | 0.7 ± 1.3 <sup>a</sup> | 0.04 ± 0.2 <sup>a</sup> | 0.2 ± 0.5 <sup>a</sup> |
| SICU        | 1.1 ± 1.2 <sup>a</sup> | 1.3 ± 1.3 <sup>a</sup> | 0.8 ± 1.3 <sup>a</sup> | 0.8 ± 1.2 <sup>a</sup> | 0.5 ± 1.0 <sup>a</sup>  | 0.5 ± 0.9 <sup>a</sup> |
| Trauma SICU | 1.2 ± 1.2 <sup>a</sup> | 1.2 ± 1.2              | 0.9 ± 1.3 <sup>a</sup> | 0.7 ± 1.1 <sup>a</sup> | 0.2 ± 0.7 <sup>a</sup>  | 0.5 ± 0.8 <sup>a</sup> |

Data are presented as mean with standard deviation and frequency (%).

<sup>a</sup> $P < 0.05$  compared to the MICU.

CCU, cardiac care unit; CNS, central nervous system; CVICU, cardiovascular intensive care unit; ICU, intensive care unit; MICU, medical intensive care unit; MICU/SICU, medical intensive care unit/surgical intensive care unit; neuro-ICU, neurological intensive care unit; NSICU, neurosurgical intensive care unit; SICU, surgical intensive care unit; SOFA, Sequential Organ Failure Assessment.

**Table S2.** AUROC of the six components of SOFA score according to type of intensive care unit.

| ICU type       | Cardiovascular<br>SOFA <sup>a</sup> (95% CI) | Coagulation SOFA <sup>a</sup><br>(95% CI) | Respiration SOFA <sup>a</sup><br>(95% CI) | Hepatic SOFA <sup>a</sup><br>(95% CI) | Central nervous<br>system SOFA <sup>a</sup><br>(95% CI) | Renal SOFA <sup>a</sup><br>(95% CI) |
|----------------|----------------------------------------------|-------------------------------------------|-------------------------------------------|---------------------------------------|---------------------------------------------------------|-------------------------------------|
| Overall        | 0.663 (0.654–0.673)                          | 0.566 (0.556–0.576)                       | 0.619 (0.610–0.629)                       | 0.606 (0.598–0.614)                   | 0.653 (0.642–0.663)                                     | 0.701 (0.692–0.710)                 |
| MICU           | 0.687 (0.670–0.703)                          | 0.601 (0.584–0.618)                       | 0.669 (0.652–0.686)                       | 0.624 (0.607–0.640)                   | 0.640 (0.62–0.659)                                      | 0.680 (0.660–0.694)                 |
| MICU/<br>SICU  | 0.648 (0.63–0.666) <sup>b</sup>              | 0.591 (0.572–0.61)                        | 0.646 (0.628–0.664)                       | 0.549 (0.532–0.566)                   | 0.690 (0.671–0.710) <sup>b</sup>                        | 0.664 (0.642–0.680)                 |
| CCU            | 0.700 (0.673–0.727)                          | 0.538 (0.512–0.564) <sup>b</sup>          | 0.687 (0.66–0.713)                        | 0.584 (0.561–0.606) <sup>b</sup>      | 0.707 (0.678–0.735) <sup>b</sup>                        | 0.694 (0.665–0.719)                 |
| CVICU          | 0.708 (0.668–0.749)                          | 0.570 (0.522–0.618)                       | 0.594 (0.545–0.642) <sup>b</sup>          | 0.617 (0.585–0.65)                    | 0.601 (0.556–0.646)                                     | 0.796 (0.763–0.833) <sup>b</sup>    |
| NSICU          | 0.588 (0.520–0.656) <sup>b</sup>             | 0.595 (0.529–0.661)                       | 0.572 (0.509–0.635) <sup>b</sup>          | 0.565 (0.512–0.618) <sup>b</sup>      | 0.560 (0.469–0.65)                                      | 0.663 (0.606–0.737)                 |
| Neuro-ICU      | 0.516 (0.373–0.660) <sup>b</sup>             | 0.536 (0.427–0.644)                       | 0.558 (0.473–0.642) <sup>b</sup>          | 0.578 (0.479–0.677)                   | 0.769 (0.652–0.885) <sup>b</sup>                        | 0.629 (0.529–0.779)                 |
| SICU           | 0.630 (0.605–0.656) <sup>b</sup>             | 0.578 (0.554–0.603)                       | 0.610 (0.585–0.634) <sup>b</sup>          | 0.582 (0.559–0.605) <sup>b</sup>      | 0.667 (0.638–0.696)                                     | 0.644 (0.619–0.67) <sup>b</sup>     |
| Trauma<br>SICU | 0.706 (0.679–0.734)                          | 0.605 (0.576–0.633)                       | 0.655 (0.625–0.685)                       | 0.584 (0.560–0.608) <sup>b</sup>      | 0.589 (0.553–0.624) <sup>b</sup>                        | 0.696 (0.659–0.718)                 |

<sup>a</sup> $P < 0.05$  by comparison of ICU types.

<sup>b</sup> $P < 0.05$  compared to the MICU.

AUROC, area under the receiver operating characteristic curve; CCU, cardiac care unit; CI, confidence interval; CVICU, cardiovascular intensive care unit; ICU, intensive care unit; MICU, medical intensive care unit; MICU/SICU, medical intensive care unit/surgical intensive care unit; neuro-ICU, neurological intensive care unit; NSICU, neurosurgical intensive care unit; SICU, surgical intensive care unit; SOFA, Sequential Organ Failure Assessment.

**Table S3.** SOFA score cutoffs for in-hospital mortality according to ICU type.

| ICU type    | Cutoff | AUROC (95% CI)      | Sensitivity (95% CI) | Specificity (95% CI) | Positive predictive value (95% CI) | Negative predictive value (95% CI) |
|-------------|--------|---------------------|----------------------|----------------------|------------------------------------|------------------------------------|
| Overall     | 6.5    | 0.721 (0.713–0.729) | 71.2 (69.7–72.7)     | 72.9 (72.4–73.5)     | 27.2 (26.3–28.1)                   | 94.7 (94.4–95.0)                   |
| MICU        | 7.5    | 0.729 (0.715–0.744) | 70.7 (67.9–73.3)     | 75.2 (74.0–76.3)     | 37.5 (35.5–39.6)                   | 92.4 (91.6–93.2)                   |
| MICU/SICU   | 6.5    | 0.725 (0.710–.741)  | 70.6 (67.5–73.4)     | 74.5 (73.3–75.7)     | 35.2 (33.1–37.4)                   | 92.8 (91.9–93.6)                   |
| CCU         | 6.5    | 0.755 (0.733–0.777) | 76.3 (72.1–80.2)     | 74.6 (72.7–76.5)     | 38.9 (35.7–42.2)                   | 93.7 (92.5–94.8)                   |
| CVICU       | 7.5    | 0.759 (0.727–0.792) | 73.0 (66.0–79.2)     | 78.9 (77.9–79.9)     | 8.9 (7.5–10.4)                     | 99.0 (98.7–99.3)                   |
| NSICU       | 4.5    | 0.675 (0.619–0.732) | 75.3 (63.9–84.7)     | 59.8 (54.3–65.0)     | 28.8 (22.5–35.8)                   | 91.8 (87.4–95.1)                   |
| Neuro-ICU   | 3.5    | 0.757 (0.654–0.859) | 81.3 (54.4–96.0)     | 70.1 (64.5–75.2)     | 12.9 (7.04–21.0)                   | 98.6 (95.9–99.7)                   |
| SICU        | 4.5    | 0.689 (0.670–0.709) | 79.1 (75.3–82.6)     | 58.7 (57.1–60.4)     | 21.4 (19.6– 23.4)                  | 95.2 (94.2–96.1)                   |
| Trauma SICU | 6.5    | 0.722 (0.697–0.748) | 64.7 (59.5–69.6)     | 79.8 (78.3–81.2)     | 28.6 (25.6–31.9)                   | 94.7 (93.8–95.6)                   |

AUROC, area under the receiver operating characteristic curve; CCU, cardiac care unit; CI, confidence interval; CVICU, cardiovascular intensive care unit; ICU, intensive care unit; MICU, medical intensive care unit; MICU/SICU, medical intensive care unit/surgical intensive care unit; neuro-ICU, neurological intensive care unit; NSICU, neurosurgical intensive care unit; SICU, surgical intensive care unit; SOFA, Sequential Organ Failure Assessment.

**Table S4.** APACHE III score cutoffs for in-hospital mortality based on ICU type.

| ICU type    | Cutoff | AUROC (95% CI)      | Sensitivity (95% CI) | Specificity (95% CI) | Positive predictive value (95% CI) | Negative predictive value (95% CI) |
|-------------|--------|---------------------|----------------------|----------------------|------------------------------------|------------------------------------|
| Overall     | 67.5   | 0.733 (0.726–0.741) | 75.0 (73.6–76.4)     | 71.7 (71.1–72.2)     | 27.3 (26.4–28.2)                   | 95.3 (95.0–95.6)                   |
| MICU        | 79.5   | 0.721 (0.706–0.736) | 63.7 (60.9–66.5)     | 80.4 (79.3–81.4)     | 40.7 (38.4–43.0)                   | 91.3 (90.5–92.1)                   |
| MICU/SICU   | 74.5   | 0.729 (0.713–0.745) | 69.8 (66.8–72.7)     | 76.0 (74.7–77.2)     | 36.3 (34.1–38.6)                   | 92.8 (91.9–93.5)                   |
| CCU         | 69.5   | 0.741 (0.719–0.763) | 77.4 (73.3–81.2)     | 70.8 (68.8–72.7)     | 35.9 (32.9–39.0)                   | 93.7 (92.4–94.8)                   |
| CVICU       | 61.5   | 0.781 (0.753–0.809) | 82.7 (76.5–87.9)     | 73.5 (72.4–74.6)     | 8.1 (6.9–9.4)                      | 99.3 (99.1–99.5)                   |
| NSICU       | 59.5   | 0.668 (0.608–0.729) | 64.4 (52.3–75.3)     | 69.2 (64.0–74.1)     | 31.1 (23.8–39.2)                   | 90.0 (85.7–93.4)                   |
| Neuro-ICU   | 55.5   | 0.812 (0.746–0.879) | 93.8 (69.8–99.8)     | 68.7 (63.1–74.0)     | 14.0 (8.1–22.1)                    | 99.5 (97.3–100)                    |
| SICU        | 67.5   | 0.701 (0.679–0.723) | 66.2 (61.8–70.4)     | 74.0 (72.5–75.5)     | 26.6 (24.2–29.2)                   | 93.9 (92.9–94.8)                   |
| Trauma SICU | 63.5   | 0.727 (0.703–0.751) | 72.3 (67.4–76.9)     | 73.1 (71.4–76.9)     | 25.2 (22.6–28.0)                   | 95.5 (94.5–96.3)                   |

AUROC, area under the receiver operating characteristic curve; CCU, cardiac care unit; CI, confidence interval; CVICU, cardiovascular intensive care unit; ICU, intensive care unit; MICU, medical intensive care unit; MICU/SICU, medical intensive care unit/surgical intensive care unit; NSICU, neurosurgical intensive care unit; Neuro-ICU, neurological intensive care unit; SICU, surgical intensive care unit; SOFA, Sequential Organ Failure Assessment.

**Table S5.** SAPS II score cutoffs for in-hospital mortality based on ICU type.

| ICU type    | Cutoff | AUROC (95% CI)      | Sensitivity (95% CI) | Specificity (95% CI) | Positive predictive value (95% CI) | Negative predictive value (95% CI) |
|-------------|--------|---------------------|----------------------|----------------------|------------------------------------|------------------------------------|
| Overall     | 41.5   | 0.719 (0.711–0.727) | 70.3 (68.8–71.8)     | 73.4 (72.9–74.0)     | 27.3 (26.4–28.2)                   | 94.6 (94.3–94.9)                   |
| MICU        | 43.5   | 0.723 (0.708–0.737) | 67.6 (64.8–70.3)     | 76.9 (75.8–78.1)     | 38.2 (36.1–40.4)                   | 91.8 (91.0–92.6)                   |
| MICU/SICU   | 44.5   | 0.728 (0.712–0.744) | 69.1 (66.0–72.0)     | 76.4 (75.2–77.6)     | 36.6 (34.3–38.9)                   | 92.6 (91.8–93.4)                   |
| CCU         | 42.5   | 0.733 (0.710–0.755) | 71.9 (67.5–76.0)     | 74.6 (72.7–76.4)     | 37.4 (34.2–40.8)                   | 92.6 (91.3–93.8)                   |
| CVICU       | 41.5   | 0.739 (0.707–0.771) | 74.6 (67.7–80.7)     | 73.1 (72.1–74.2)     | 7.3 (6.1–8.5)                      | 99.0 (98.7–99.3)                   |
| NSICU       | 36.5   | 0.702 (0.646–0.757) | 76.7 (65.4–85.8)     | 63.6 (58.2–68.7)     | 31.3 (24.6–38.6)                   | 92.7 (88.5–95.7)                   |
| Neuro-ICU   | 38.5   | 0.732 (0.612–0.851) | 68.8 (41.3–89.0)     | 77.6 (72.3–82.2)     | 14.3 (7.4–24.1)                    | 97.9 (95.1–99.3)                   |
| SICU        | 37.5   | 0.687 (0.666–0.709) | 71.7 (67.5–75.6)     | 65.8 (64.2–67.4)     | 23.0 (20.9–25.2)                   | 94.2 (93.2–95.1)                   |
| Trauma SICU | 39.5   | 0.740 (0.716–0.764) | 72.9 (68.0–77.4)     | 75.2 (73.6–76.7)     | 26.9 (24.2–29.8)                   | 95.7 (94.8–96.5)                   |

AUROC, area under the receiver operating characteristic curve; CCU, cardiac care unit; CI, confidence interval; CVICU, cardiovascular intensive care unit; ICU, intensive care unit; MICU, medical intensive care unit; MICU/SICU, medical intensive care unit/surgical intensive care unit; NSICU, neurosurgical intensive care unit; Neuro-ICU, neurological intensive care unit; SICU, surgical intensive care unit; SOFA, Sequential Organ Failure Assessment.

**Figure S1.** Calibration plots of SOFA scores according to ICU type.

**A. Total SOFA**

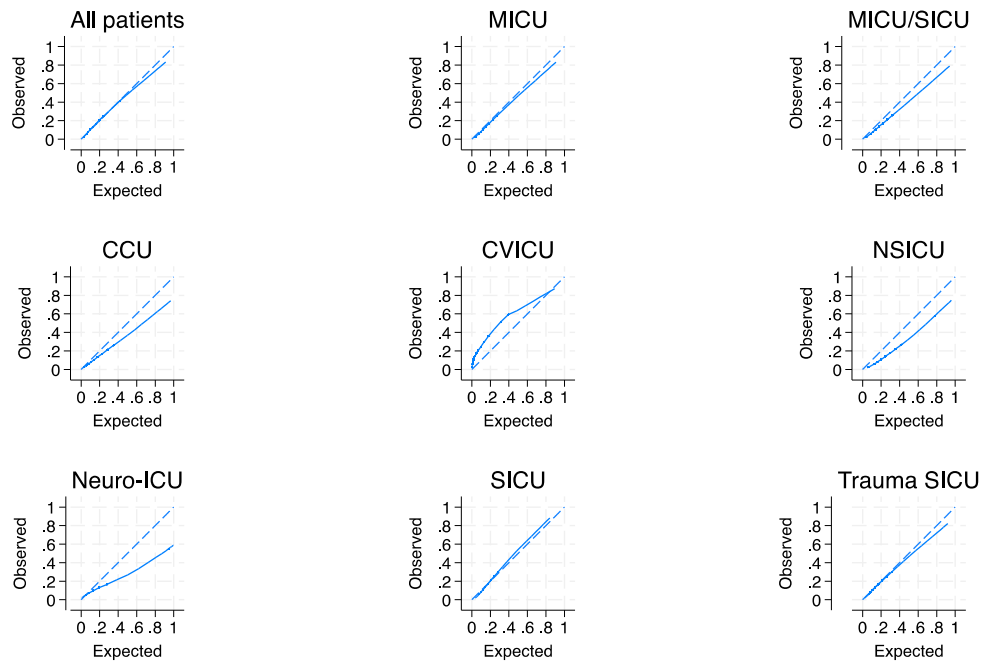

**B. Cardiovascular SOFA**

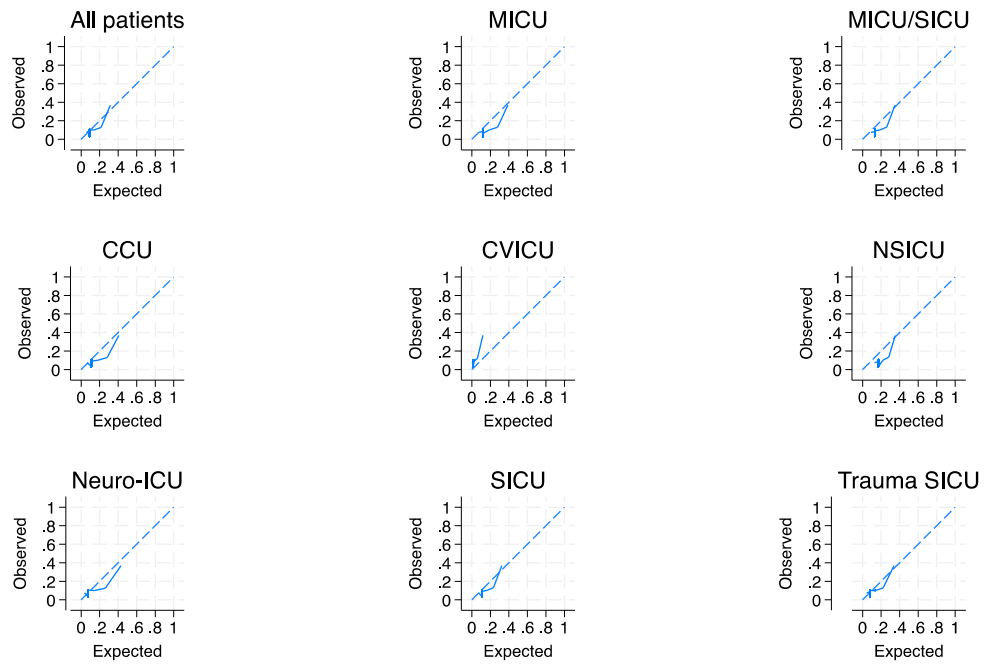

### C. Coagulation SOFA

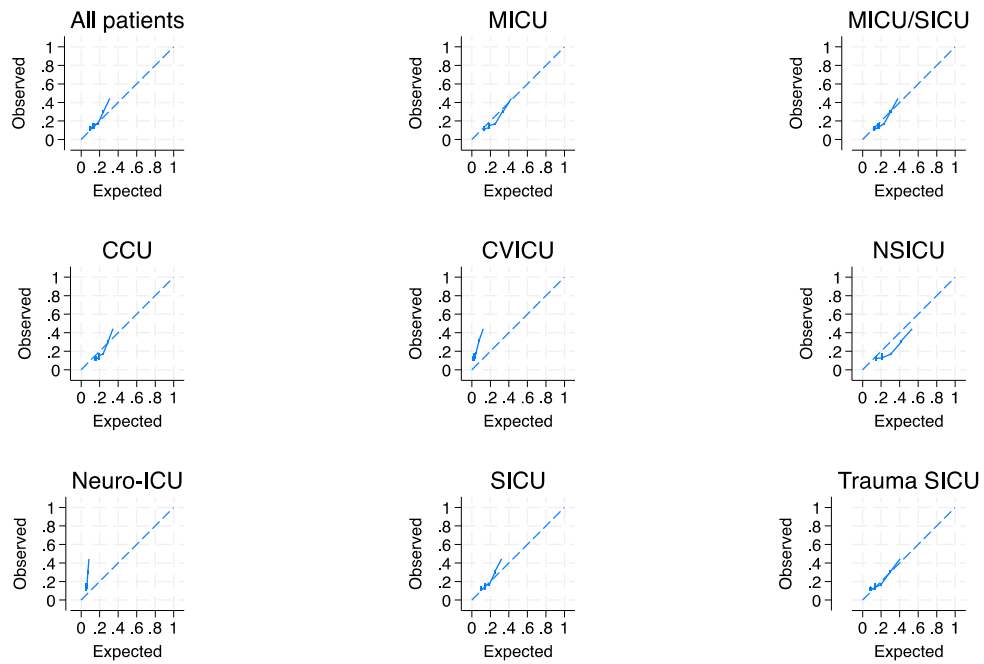

### D. Respiratory SOFA

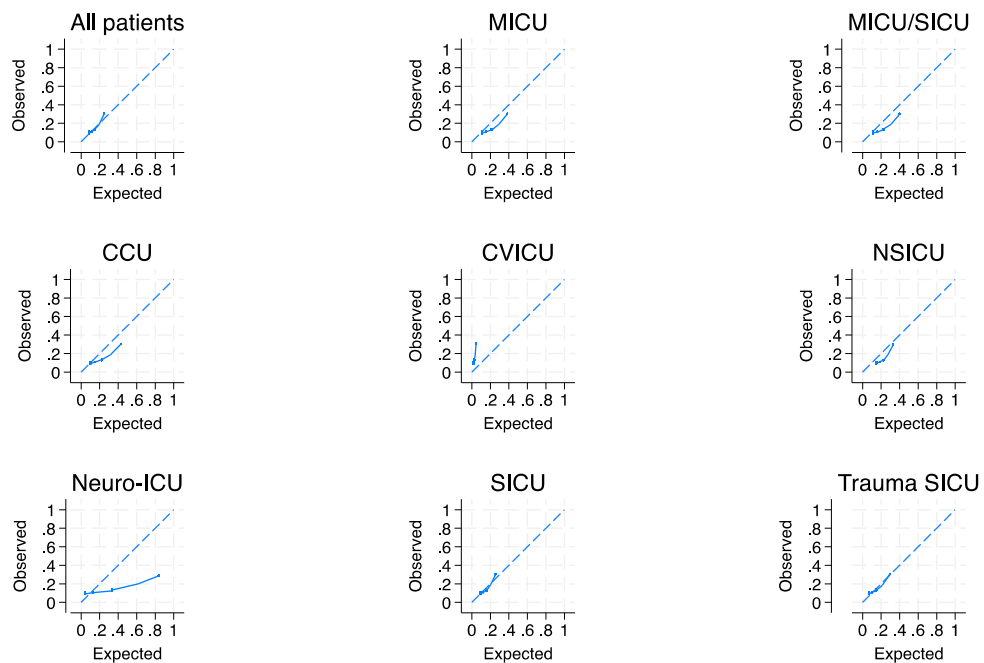

## E. Hepatic SOFA

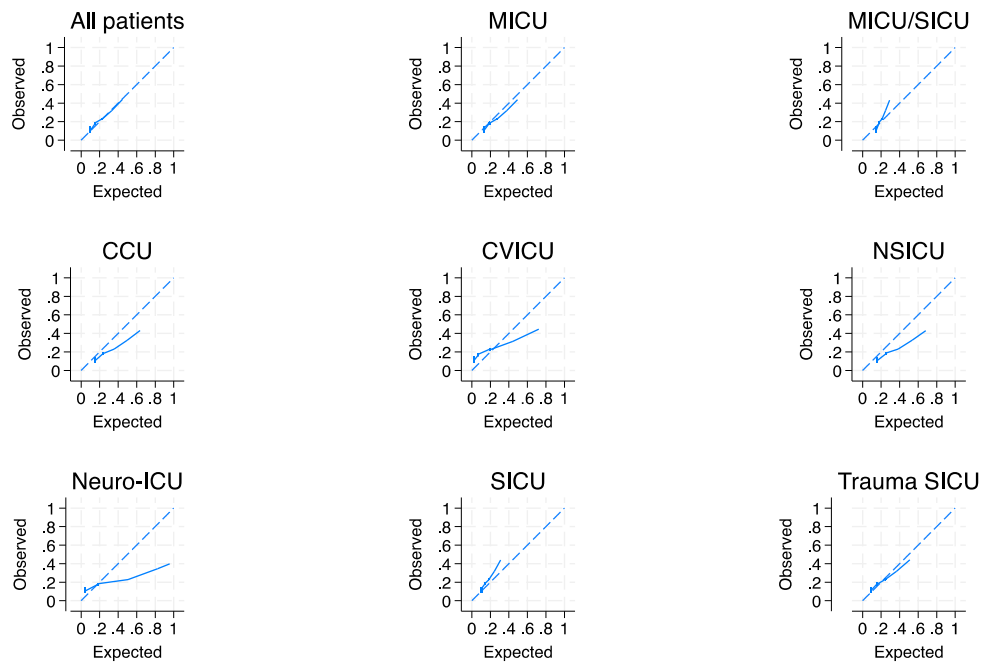

## F. CNS SOFA

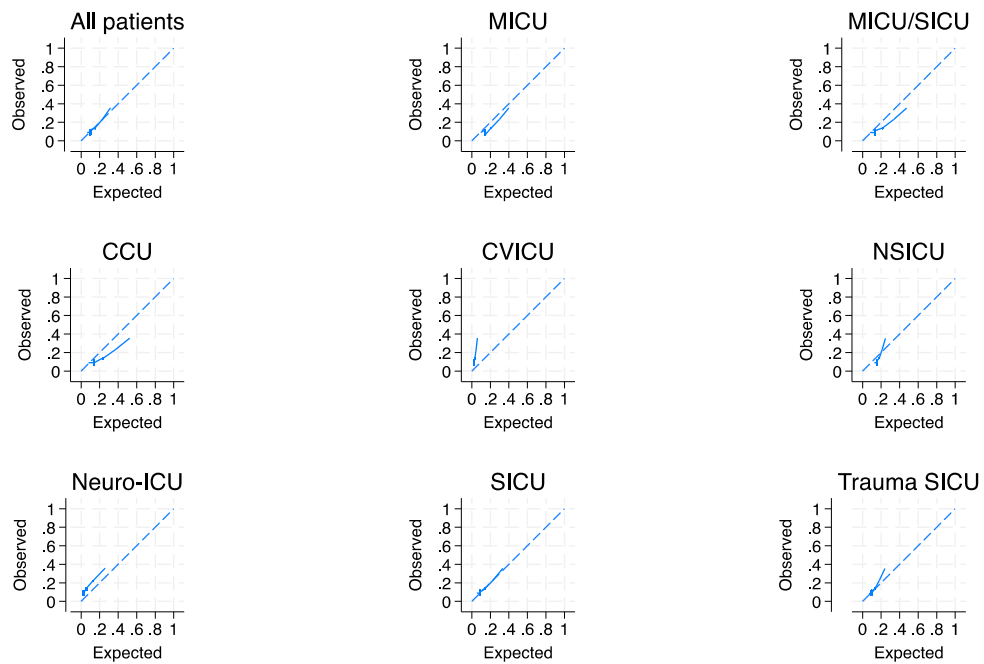



## G. Renal SOFA

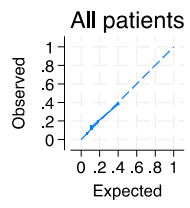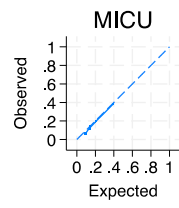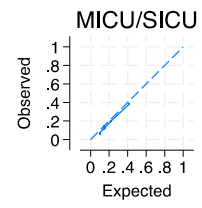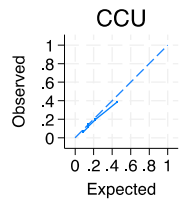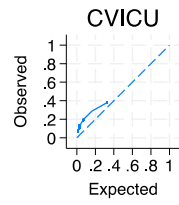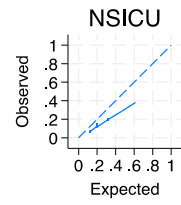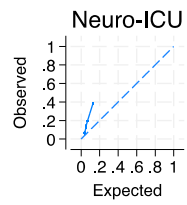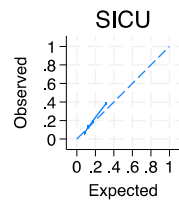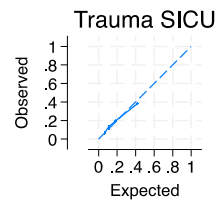

**Figure S2.** Calibration plots of APACHE III scores according to ICU type.

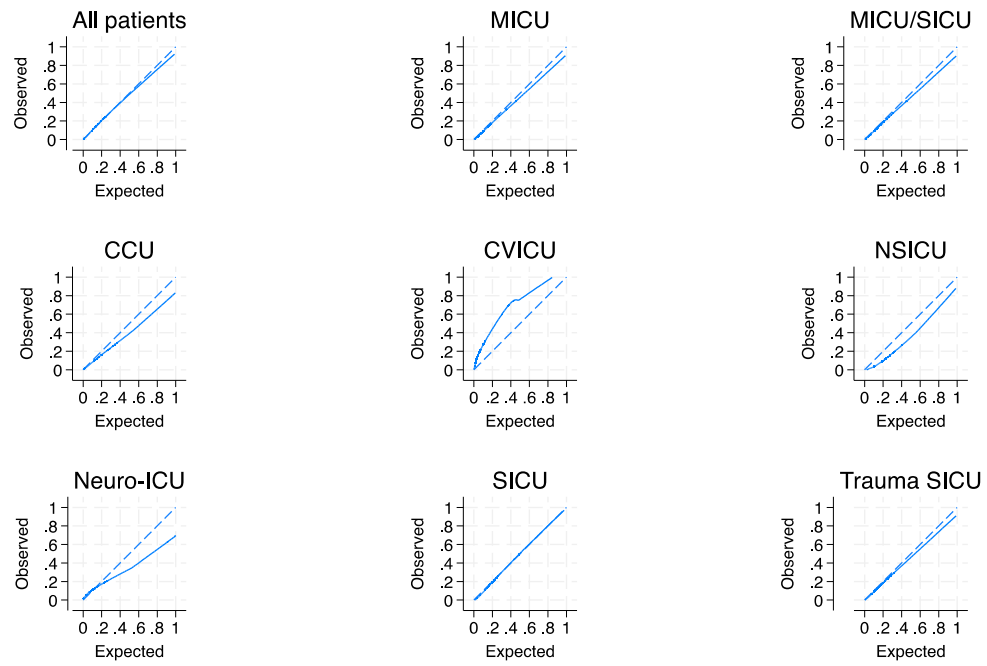

**Figure S3.** Calibration plots of SAPS II scores according to ICU type.

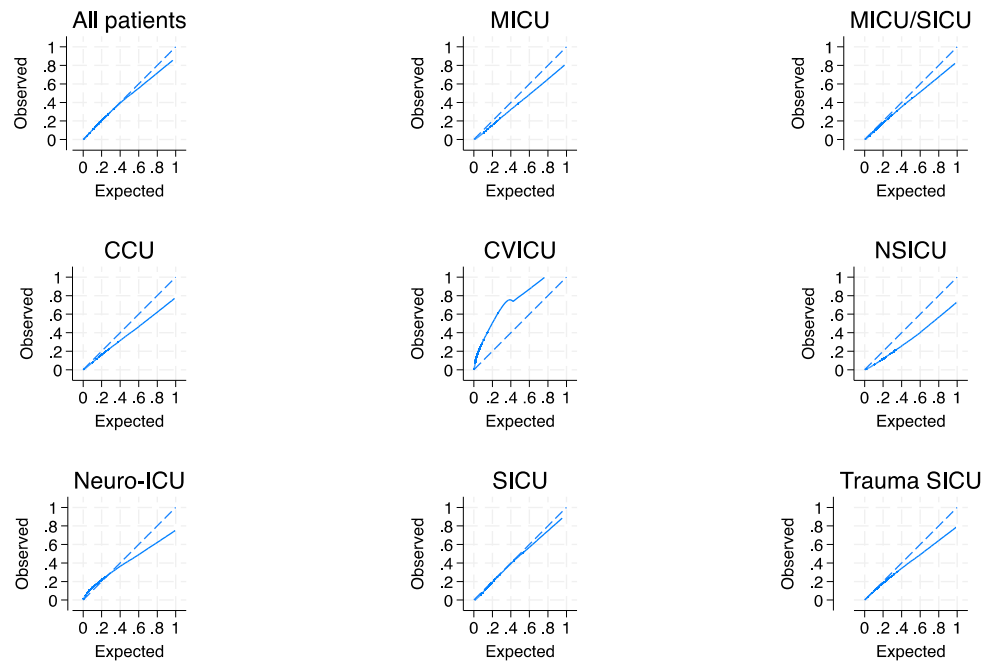

Supplement: s1 [file s1]
